# Supplementary material for: Endoribonuclease YbeY Is Essential for RNA Processing and Virulence in Pseudomonas aeruginosa
Source: PubMed Central journal article supplement (PMC7327168; doi:10.1128/mbio.00659-20), 2020-06-30
Supplement: mBio.00659-20-sf002.pdf [file mBio.00659-20-sf002.pdf]

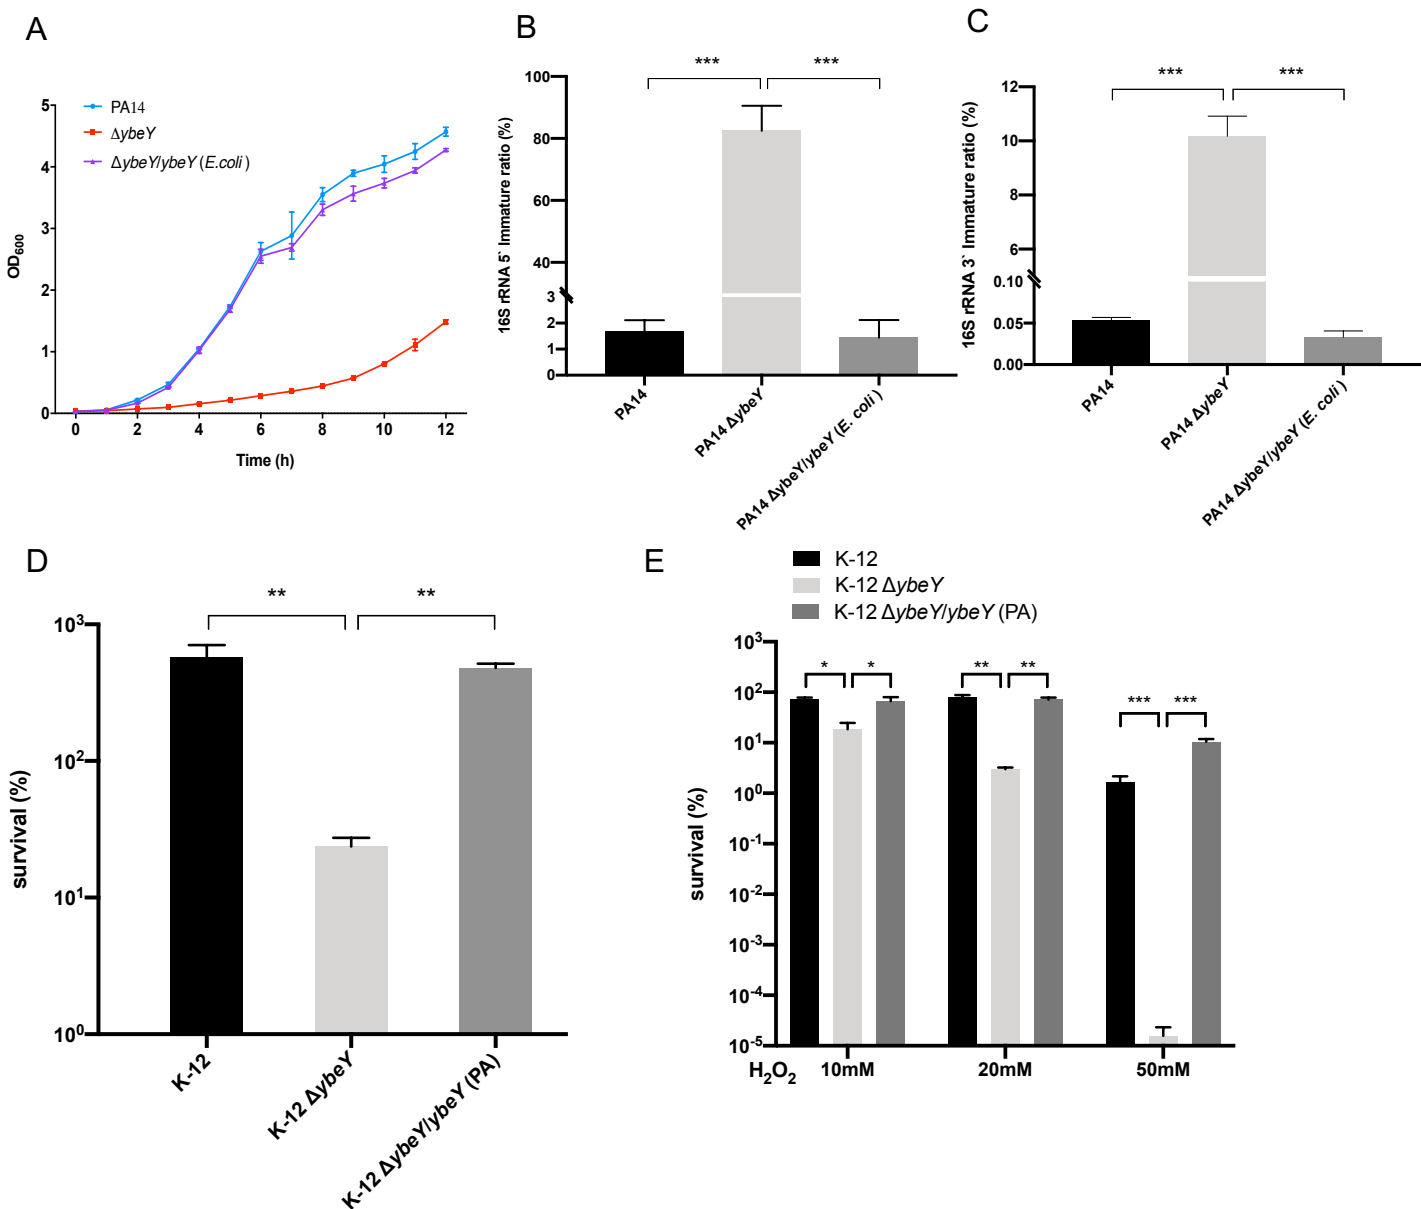

**Fig. S2 Functional similarities between the *P. aeruginosa* and *E. coli* YbeY.** (A) Same number of cells of the indicated strains were inoculated in LB. The OD<sub>600</sub> was monitored every hour for 12 hours. (B, C) The bacteria were grown to an OD<sub>600</sub> of 1.0, followed by total RNA isolation. The 5'-and 3'-immature ratios of the 16S rRNA was determined by real-time PCR. (D) The bacteria were grown to an OD<sub>600</sub> of 1.0 at 37 °C and then incubated at 45 °C for two hours. The live bacterial cell numbers were determined by serial dilution and plating. (E) The bacteria were cultured to an OD<sub>600</sub> of 1, and then washed three times with PBS and resuspended in PBS. The bacteria were treated with 10, 20 or 50 mM H<sub>2</sub>O<sub>2</sub> at 37 °C for 30 min. The live bacterial cell numbers were determined by serial dilution and plating. The survival rate was calculated by comparing the live bacterial number after the treatment with that before the treatment. \* P < 0.05, \*\* P < 0.01, \*\*\* P < 0.001 by Student's t-test.
