# Supplementary material for: Endoribonuclease YbeY Is Essential for RNA Processing and Virulence in Pseudomonas aeruginosa
Source: PubMed Central journal article supplement (PMC7327168; doi:10.1128/mbio.00659-20), 2020-06-30
Supplement: mBio.00659-20-sf003.pdf [file mBio.00659-20-sf003.pdf]

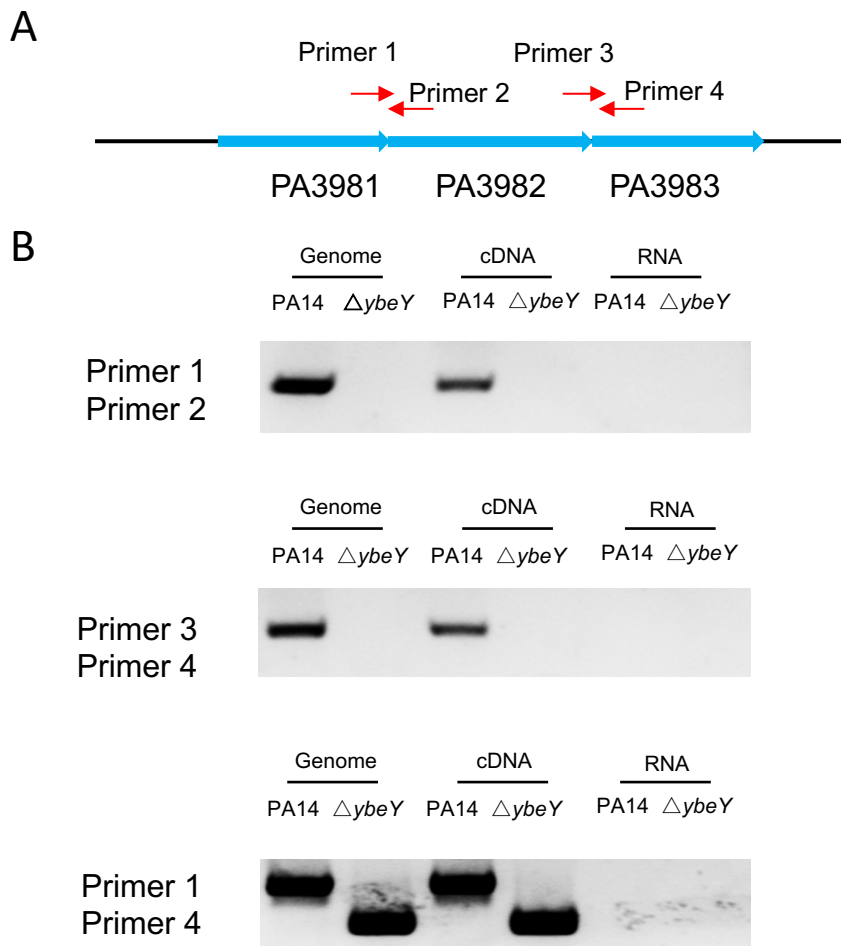

**Fig. S3 PA3981, PA3982 and PA3983 are in one operon.** (A) Locations of the primers. (B) PCR products from indicated primers and templates.
