# Supplementary material for: Endoribonuclease YbeY Is Essential for RNA Processing and Virulence in Pseudomonas aeruginosa
Source: PubMed Central journal article supplement (PMC7327168; doi:10.1128/mbio.00659-20), 2020-06-30
Supplement: mBio.00659-20-sf004.pdf [file mBio.00659-20-sf004.pdf]

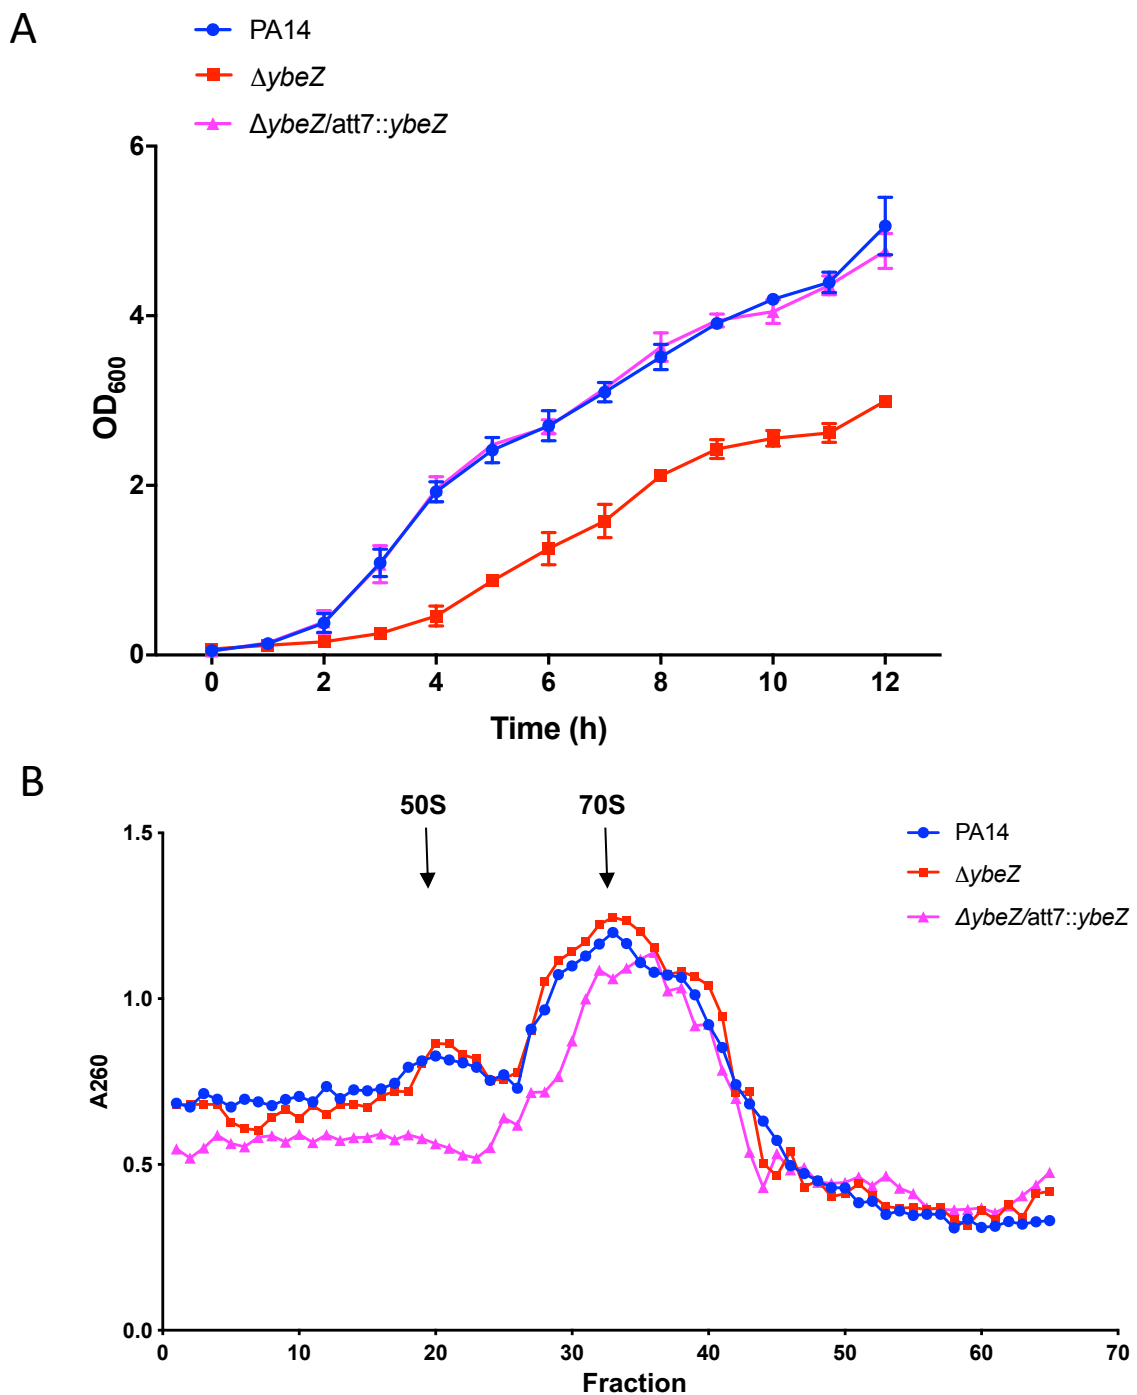

**Fig. S4. Roles of YbeZ in the bacterial growth and ribosome assemble.** (A) Growth rate of the indicated strains in LB medium. Overnight cultures of indicated strains were 1:100 diluted into fresh LB. The bacterial growth was monitored by measuring  $OD_{600}$  every hour for 12 hours. (B) Ribosome profiles from PA14, the  $\Delta ybeZ$  and  $\Delta ybeZ/att7::ybeZ$  strains. The bacteria were grown to an  $OD_{600}$  of 1. The ribosome particles were subjected to sucrose gradient separation and quantified by UV absorbance at 260 nm.
