# Supplementary material for: Endoribonuclease YbeY Is Essential for RNA Processing and Virulence in Pseudomonas aeruginosa
Source: PubMed Central journal article supplement (PMC7327168; doi:10.1128/mbio.00659-20), 2020-06-30
Supplement: mBio.00659-20-sf005.pdf [file mBio.00659-20-sf005.pdf]

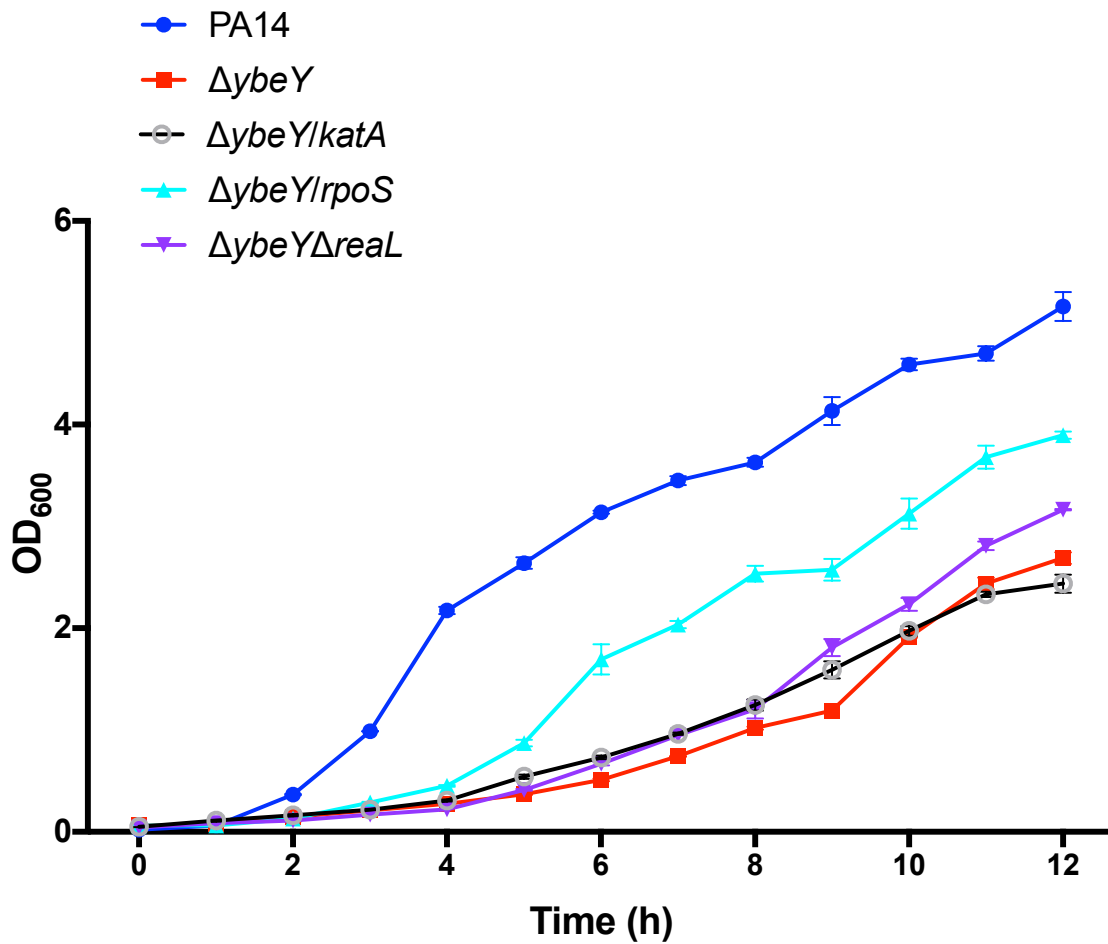

**Fig. S5. Growth rate of indicated strains in LB medium.** Overnight cultures of the indicated strains were 1:100 diluted into fresh LB. The bacterial growth was monitored by measuring OD<sub>600</sub> every hour for 12 hours.
