# Supplementary material for: Endoribonuclease YbeY Is Essential for RNA Processing and Virulence in Pseudomonas aeruginosa
Source: PubMed Central journal article supplement (PMC7327168; doi:10.1128/mbio.00659-20), 2020-06-30
Supplement: mBio.00659-20-sf006.pdf [file mBio.00659-20-sf006.pdf]

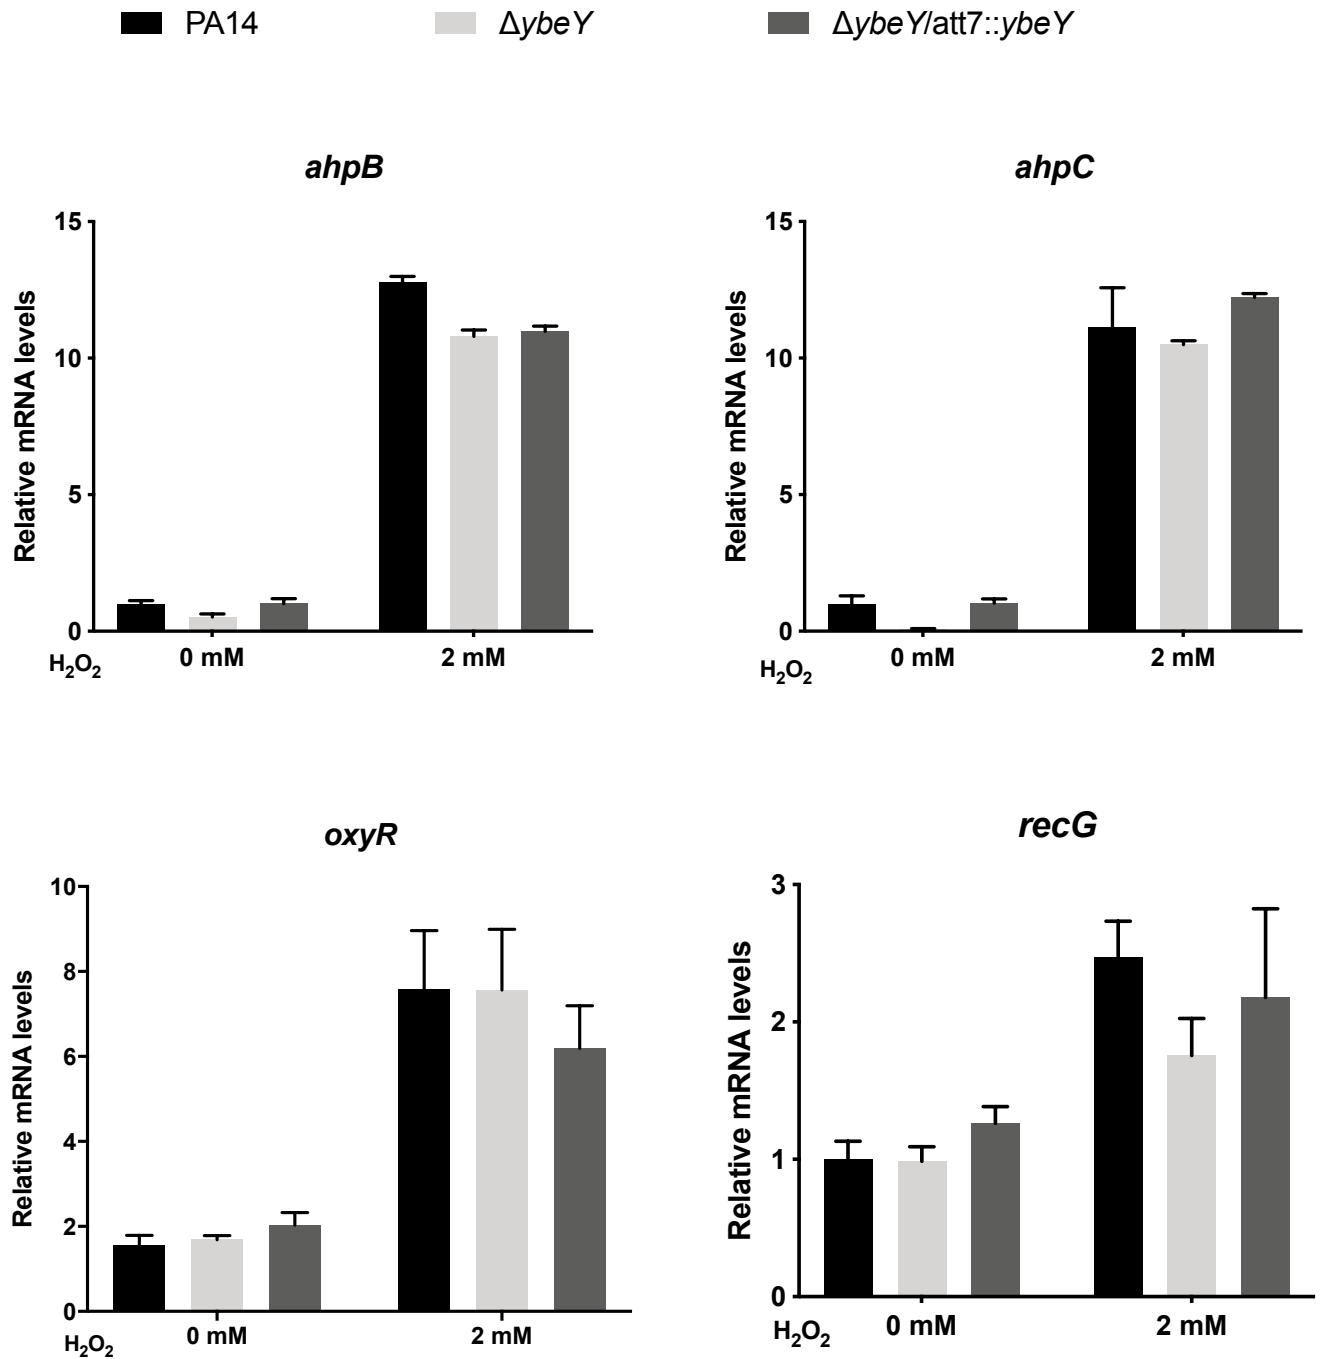

**Fig. S6. The expression of oxidative stresses response related genes.** Wild type PA14, the  $\Delta ybeY$  mutant and the complemented strain were grown in LB to an OD<sub>600</sub> of 1, then incubated with or without 2 mM H<sub>2</sub>O<sub>2</sub> for 30 min. The relative mRNA levels were determined by real time PCR. Results represent means  $\pm$  SD.
