# Supplementary material for: Endoribonuclease YbeY Is Essential for RNA Processing and Virulence in Pseudomonas aeruginosa
Source: PubMed Central journal article supplement (PMC7327168; doi:10.1128/mbio.00659-20), 2020-06-30
Supplement: mBio.00659-20-sf007.pdf [file mBio.00659-20-sf007.pdf]

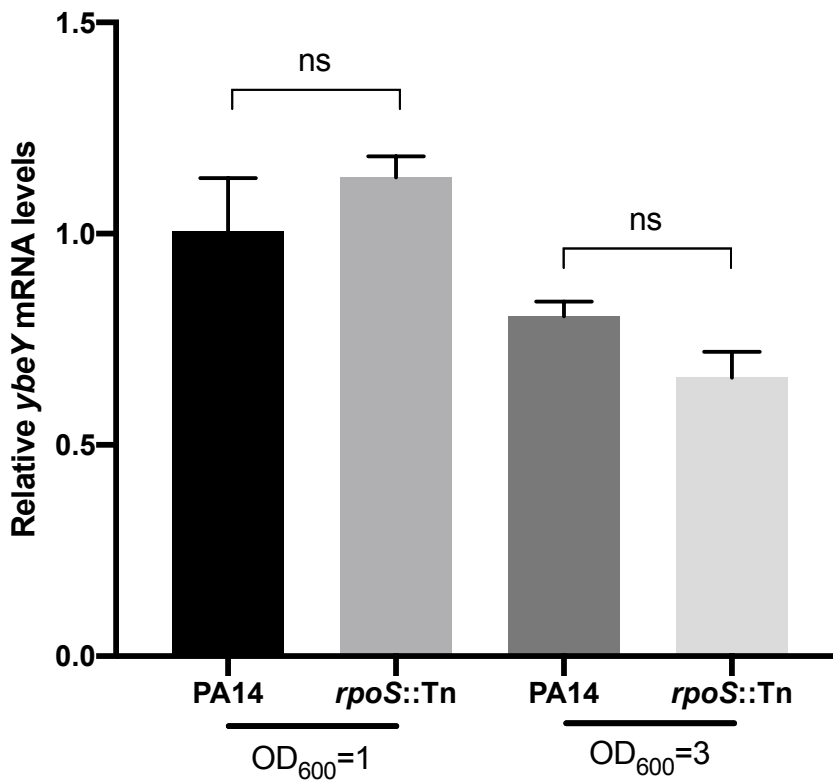

**Fig. S7. The expression of *ybeY*.** Wild type PA14 and the *rpoS::Tn* mutant were grown in LB to an OD<sub>600</sub> of 1 or 3. The relative mRNA levels of *ybeY* were determined by real time PCR. Results represent means  $\pm$  SD. ns, not significant by Student's t-test.
